# Supplementary material for: Focus on Key Issues in Immune Thrombotic Thrombocytopenic Purpura: Italian Experience of Six Centers
Source: J Clin Med. 2021 Dec 4;10(23):5702. doi: 10.3390/jcm10235702 (PMC8658151; doi:10.3390/jcm10235702)
Supplement: Supplementary file 1 [file jcm-10-05702-s001.zip › jcm-1471560-supplementary.pdf]

**Supplementary Table S1.** Drugs recorded in the study population of patients experiencing first iTTP episode,  $n = 74$ .

| Drugs                                                   | Values    |
|---------------------------------------------------------|-----------|
| Antibiotics, $n$ (%)                                    | 10 (13.5) |
| Statins, $n$ (%)                                        | 6 (8.1)   |
| Beta blockers, $n$ (%)                                  | 5 (6.7)   |
| Calcium channel blockers, $n$ (%)                       | 4 (5.4)   |
| Angiotensin-converting enzyme (ACE) inhibitors, $n$ (%) | 4 (5.4)   |
| Sartans, $n$ (%)                                        | 4 (5.4)   |
| Anti-depressants, $n$ (%)                               | 4 (5.4)   |
| Oral Contraceptives, $n$ (%)                            | 3 (4.0)   |
| NSAIDs, $n$ (%)                                         | 2 (2.7)   |
| Immunosuppressants, $n$ (%)                             | 1 (1.3)   |
| Chemotherapy, $n$ (%)                                   | 1 (1.3)   |
| Anti-malarial, $n$ (%)                                  | 1 (1.3)   |
| Clopidogrel, $n$ (%)                                    | 1 (1.3)   |

NSAIDs: Non-Steroidal Anti-Inflammatory Drugs.
